# Supplementary material for: Symbiosis: the other cells in development
Source: Oxford University Press journal article supplement (doi:10.1242/dev.200797), 2022-07-01
Supplement: dev200797supp.pdf [file dev200797supp.pdf]

**Table S1.** A representative (but not compensative) list of references for each reproductive and developmental stage for the major animal phyla. This corresponds with Figure 1. Please note that “Ovary” is used as a general term to describe the host’s reproductive system and is not always used in a literal sense.

[Click here to download Table S1](#)
